# Supplementary material
Source: publisher figshare collection journal article supplement (https://acs.figshare.com/ndownloader/files/10725841)
Supplement: Supplementary file 3 [file 10725841]

**Permission Request Form for Use of *Individual and/or Group Photos*  
in *ACS LiveSlides* from Copyright Owners/Publishers/Photographers  
Other Than ACS**

Date: 08.03.2018

To: Tanja Becke  
Publisher's/Copyright Owner's Contact Information  
Fürholzer Weg 33c  
85375 Neufahrn  
Germany  
tbecke@hm.edu  
Publisher's/Copyright Owner's Email Address

From: Tanja Becke  
Your Name and Complete Mailing Address  
Fürholzer Weg 33c  
85375 Neufahrn  
Germany  
+49 89 1265 3671  
Your Phone Number Including Country and City Codes  
tbecke@hm.edu  
Your Email Address

Your Specific Deadline Date

I am preparing an *ACS LiveSlides* entitled:

Single Molecule Force Spectroscopy Reveals Two-Domain Binding Mode of Pilus-A Tip Protein  
to appear with PrgA of Streptococcus Pneumoniae to Fibronectin

Single Molecule Force Spectroscopy Reveals Two-Domain Binding Mode of Pilus-A Tip Protein PrgA of  
Title of ACS Publication and DOI Streptococcus Pneumoniae to Fibronectin DOI: 10.1021/acsnano.7b07247

which is published by the American Chemical Society, a not-for-profit membership society and a STM signatory.

I would appreciate your permission to use the following material in all formats including but not limited to print, microform, electronic, and/or CD-ROM from the following reference:

**Individual Photographs of the Following Individuals:**

Tanja Becke

**Collective Photograph (s) representing the following groups:**

If you, the photographer, have a required **credit line**, please include it below:

For your convenience, you may sign and date the bottom of this letter to indicate your agreement. Please return this form to me at the above email address, by the above **deadline date** (if given above). Thank you.

Agreed:

Tanja Becke  
Publisher's/Copyright Owner's Signature or Stamp

Date:

08.03.2018

Date

SIGN HERE

Submit completed and signed form with your signed *ACS LiveSlides* Video Release.

7/25/16
